# Supplementary material for: The Integration of Social Science for Community Engagement in the Humanitarian Fields of Conflicts and Disasters: A Scoping Review
Source: MDPI journal article supplement (doi:10.3390/ijerph20196856), 2023-09-28
Supplement: s1 [file s1]

Table S1: Overview of selected studies, peer-reviewed, and grey literature.

| # |                  | Year | Title                                             | Country                  | Study Design                                 | Humanitarian Context | Summary of Findings                                                                                                                                                                                                                                                                                                                                                                                                                                                                                                                                                                                                                                                                                                                                                                                                                                                                                        |
|---|------------------|------|---------------------------------------------------|--------------------------|----------------------------------------------|----------------------|------------------------------------------------------------------------------------------------------------------------------------------------------------------------------------------------------------------------------------------------------------------------------------------------------------------------------------------------------------------------------------------------------------------------------------------------------------------------------------------------------------------------------------------------------------------------------------------------------------------------------------------------------------------------------------------------------------------------------------------------------------------------------------------------------------------------------------------------------------------------------------------------------------|
| 1 | Bava et al. [27] | 2010 | Lessons in Collaboration, Four Years Post-Katrina | United States of America | Qualitative (secondary research: case study) | Disaster             | <p>Lesson learned include: the divergent perspectives in disaster mental health field; that more face-to-face introductions would have encouraged a wider community invitation to develop a collaboration. Outsiders would have had more opportunities to develop trust with local mental health and community-service workers and to assess how local needs might match outsider resources; The fundamental quality shared by all successful collaborations is that the participants listen to each other and that those people (often professionals) initiating collaborative conversations allow other participants (clients and/or community members) to change the course of a conversation as it develops; As in all human endeavors, timing was critical. It is possible that 2 years post-disaster was an especially difficult time for outsiders to attempt to partner with community groups.</p> |

|   |                      |      |                                                                                                                                                                                        |          |                                  |          |                                                                                                                                                                                                                                                                                                                                                                                                                                                                                                                                                    |
|---|----------------------|------|----------------------------------------------------------------------------------------------------------------------------------------------------------------------------------------|----------|----------------------------------|----------|----------------------------------------------------------------------------------------------------------------------------------------------------------------------------------------------------------------------------------------------------------------------------------------------------------------------------------------------------------------------------------------------------------------------------------------------------------------------------------------------------------------------------------------------------|
| 2 | Tuerk et al. [24]    | 2013 | Forty days after the great East Japan earthquake: Field research investigating community engagement and traumatic stress screening in a post-disaster community mental health training | Japan    | Mixed-method                     | Disaster | Participant engagement in the training forum was robust. Exposure to potentially traumatic events was high in this sample. Most people reported having experienced one potentially traumatic event prior to the most recent earthquake (52%), 24% reported two exposures, and 24% reported three or more exposures.                                                                                                                                                                                                                                |
| 3 | Margolin et al. [29] | 2010 | Earthquakes and Children: The Role of Psychologists With Families and Communities                                                                                                      | China    | Qualitative (Secondary Research) | Disaster | Sustaining and empowering natural care-giving systems in the family, school, and community are essential for earthquake preparedness and restoring these systems is indispensable to reducing post-earthquake effects in children. Psychologists can play active and important roles, as part of interdisciplinary teams, to build self-reliant and self-sustaining systems of care capacities within local communities, and to coordinate these local integrated systems with external humanitarian relief efforts when needed.                   |
| 4 | Weine et al. [34]    | 2021 | Conducting research on building psychosocial support for Syrian refugee families in a humanitarian emergency                                                                           | Istanbul | Qualitative                      | Conflict | They identified multiple challenges: Non-existent or weak partnerships geared towards mental, Health Research in a humanitarian emergency, Lack of familiarity with task-sharing, Insufficient language and cultural competency. Fit with families' values and demands, Hardships of urban refugees. In order to address these challenges they identified different research strategies. The strategies included: coalition building, Building research capacity of local partners, Engaging refugee family experiences and perspectives, Flexible |

|   |                            |      |                                                                                                            |        |                                                    |          |                                                                                                                                                                                                                                                                                                                                                                                                                                                                                                           |
|---|----------------------------|------|------------------------------------------------------------------------------------------------------------|--------|----------------------------------------------------|----------|-----------------------------------------------------------------------------------------------------------------------------------------------------------------------------------------------------------------------------------------------------------------------------------------------------------------------------------------------------------------------------------------------------------------------------------------------------------------------------------------------------------|
|   |                            |      |                                                                                                            |        |                                                    |          | intervention design, Fostering evidence-based policy and program development for refugees.                                                                                                                                                                                                                                                                                                                                                                                                                |
| 5 | Rivera-Holguín et al. [20] | 2016 | A post disaster capacity building model in Peru                                                            | Peru   | Qualitative (Secondary Research)                   | Disaster | The participatory workshops promoted community mobilisation and joint action in order to improve the living conditions of the population. The impact of the capacity building approach occurred not only on a personal level, but also at community level. This change translates into concrete actions, such as the improvement of public space. Thanks to community mobilisation and action, it is now possible to improve public spaces post-earthquake with collective initiatives from the community |
| 6 | Song et al. [14]           | 2013 | Assessing the Impact of Violence and War on Youth in Low- and Middle-Income Countries                      | LMICs  | Qualitative (Secondary research: commentary)       | Conflict | Understanding the practical and ethical concerns of conducting research for youth exposed to violence and armed conflict can assist in producing studies that are powerful tools to advocate for those affected by trauma in low- and middle-income countries.                                                                                                                                                                                                                                            |
| 7 | Karadag et al. [16]        | 2021 | Challenges and lessons learned in mental health research among refugees: a community-based study in Turkey | Turkey | Qualitative (secondary research: 'lesson learned') | Conflict | The challenges identified by the researchers included: working with a highly traumatized population, legal status, lack of data, and high mobility of refugees, Safety issues and willingness to participate, Referral for services, cultural barriers, resentment from host communities, language. The strategies used to address these challenges included: training of data collectors, cultural                                                                                                       |

|   |                         |      |                                                                                                                                                              |                                                                                                 |                                                       |                                |                                                                                                                                                                                                                                                                                                                                                                                                                                                                                                                                                                                                            |
|---|-------------------------|------|--------------------------------------------------------------------------------------------------------------------------------------------------------------|-------------------------------------------------------------------------------------------------|-------------------------------------------------------|--------------------------------|------------------------------------------------------------------------------------------------------------------------------------------------------------------------------------------------------------------------------------------------------------------------------------------------------------------------------------------------------------------------------------------------------------------------------------------------------------------------------------------------------------------------------------------------------------------------------------------------------------|
|   |                         |      |                                                                                                                                                              |                                                                                                 |                                                       |                                | considerations and gender-sensitive approach, sampling methodologies, community participation and pilot testing, and safety considerations.                                                                                                                                                                                                                                                                                                                                                                                                                                                                |
| 8 | Mistry et al. [30]      | 2021 | Introduction to collection: confronting the challenges of health research in humanitarian crises                                                             | Collection of articles spanning 27 countries, and covering a broad range of humanitarian crises | Qualitative (secondary research: articles collection) | Both (disasters and conflicts) | -need of research: First and foremost, there is a clear need for humanitarian health research. Several authors noted the limited evidence base in their area of study and all the studies in this collection aimed to address an evidence gap or need. Partnership with humanitarian actors, including local governments, local and international NGOs, and UN agencies, was found to be a critical strategy in the collection.                                                                                                                                                                            |
| 9 | Vega Ocasio et al. [26] | 2020 | Conducting an immersive community based assessment of post-hurricane experience among Puerto Ricans: lived experience of medical ecology in an environmental | Puerto Rico                                                                                     | Qualitative (Secondary research)                      | Disaster                       | Lesson 1: using the critical medical ecological model helped organize our work and response. Lesson 2: incorporation of participation and methods that prioritize authenticity. Investigators recognized the need to approach our research participants as collaborators and to strive toward building and relying upon authentic partnerships to collect and analyze data. Lesson 3: understand the trauma experience and incorporate study methods sensitive to it. Given the massive trauma experienced by Puerto Ricans in this period, and their witness to that suffering, they needed to prioritize |

|    |                       |      |                                                                                                           |                                     |             |          |                                                                                                                                                                                                                                                                                                                                                                                                                                                                                                                                                                                                                                                                                                                                                                                                                                                                                                                                                                                                                                                                                                                             |
|----|-----------------------|------|-----------------------------------------------------------------------------------------------------------|-------------------------------------|-------------|----------|-----------------------------------------------------------------------------------------------------------------------------------------------------------------------------------------------------------------------------------------------------------------------------------------------------------------------------------------------------------------------------------------------------------------------------------------------------------------------------------------------------------------------------------------------------------------------------------------------------------------------------------------------------------------------------------------------------------------------------------------------------------------------------------------------------------------------------------------------------------------------------------------------------------------------------------------------------------------------------------------------------------------------------------------------------------------------------------------------------------------------------|
|    |                       |      | disaster and migration                                                                                    |                                     |             |          | understanding such experiences and incorporate it into our approach                                                                                                                                                                                                                                                                                                                                                                                                                                                                                                                                                                                                                                                                                                                                                                                                                                                                                                                                                                                                                                                         |
| 10 | Safarpour et al. [32] | 2020 | Challenges and barriers of humanitarian aid management in 2017 Kermanshah earthquake: a qualitative study | Kermanshah province in west of Iran | Qualitative | Disaster | <p>Managerial barriers:</p> <ul style="list-style-type: none"> <li>-lack of public and organizational education</li> <li>-Command and coordination: the multiplicity of the organizations responsible for the disasters is considered as a serious challenge for managing humanitarian aids and donations.</li> <li>-Communications and information: They were dissatisfied with the weak performance of the media and lack of control on several social networks.</li> <li>- Lack of rules and supervising system. Structural barriers</li> <li>- Security - Assessment: Lack of assessing the needs and capacity of the area is influenced by two main challenges reported by the participants.</li> <li>-Providing system: reserving and distributing the humanitarian aids</li> <li>-Cultural setting: They emphasized that lack of community trust in GOs versus the excessive trust they had in celebrities and renowned persons as one of the main challenges. The responsible GOs and the NGOs were inattentive to people's culture and customs, leading to some problems in managing humanitarian aids.</li> </ul> |

|    |                       |      |                                                                                                                 |           |                                                                |          |                                                                                                                                                                                                                                                                                                                                                                                                                                                                                                                                                                                                                                                                                                                                                                                          |
|----|-----------------------|------|-----------------------------------------------------------------------------------------------------------------|-----------|----------------------------------------------------------------|----------|------------------------------------------------------------------------------------------------------------------------------------------------------------------------------------------------------------------------------------------------------------------------------------------------------------------------------------------------------------------------------------------------------------------------------------------------------------------------------------------------------------------------------------------------------------------------------------------------------------------------------------------------------------------------------------------------------------------------------------------------------------------------------------------|
| 11 | Jahangiri et al. [38] | 2021 | A comparative study on community-based disaster management in selected countries and designing a model for Iran | Iran      | Qualitative (secondary research: systematic literature review) | Disaster | <p>Various participatory actions in mentioned seven selected countries were illustrated to show the different level of participation (in the process of planning, policy making, organizing, coordination and control). Based on the results, a model has been designed and proposed in order to make the community based disaster management more feasible in Iran. One of the characteristics of this model is the involvement and participation of the community through designing “Strategic Planning Councils” for guiding the stakeholders’ participation. The role which strategic councils play in this level is more of consultation and the emphasis of this model is on people participation on the local level in villages and neighborhood participation in the cities.</p> |
| 12 | Cueto et al. [21]     | 2015 | Community Participation and Strengthening in a Reconstruction Context After a Natural Disaster                  | Peru      | Qualitative                                                    | Disaster | <p>The analyzed results herein revolve around three axes that emerged from the work sessions and that are linked with the concepts of enhancement and community participation in the framework of a process of reconstruction post-disaster: (1) the felt and prioritize needs following a disaster, (2) the relationships with power and leadership within the communities, and (3) the characteristics and reaches of community participation in the areas of study.</p>                                                                                                                                                                                                                                                                                                               |
| 13 | Lee [15]              | 2008 | Local perspectives on humanitarian aid in Sri Lanka after the tsunami                                           | Sri Lanka | Qualitative                                                    | Disaster | <ul style="list-style-type: none"> <li>• This study found that rapid participatory approaches can be used to obtain beneficiary feedback in post-disaster settings to guide programme planning</li> <li>• Satisfaction of beneficiary needs is essential</li> <li>• An understanding of the context in which aid is delivered is essential. Failure to do so risks exacerbating</li> </ul>                                                                                                                                                                                                                                                                                                                                                                                               |

|    |                      |      |                                                                                                                |                          |                                                     |          |                                                                                                                                                                                                                                                                                                                                                                                                                                                                                                                                                              |
|----|----------------------|------|----------------------------------------------------------------------------------------------------------------|--------------------------|-----------------------------------------------------|----------|--------------------------------------------------------------------------------------------------------------------------------------------------------------------------------------------------------------------------------------------------------------------------------------------------------------------------------------------------------------------------------------------------------------------------------------------------------------------------------------------------------------------------------------------------------------|
|    |                      |      |                                                                                                                |                          |                                                     |          | <p>pre-existing tensions or creating new ones.</p> <ul style="list-style-type: none"> <li>• Beneficiary accountability requires meaningful community engagement, good handling of community relations, and sensitive matching of aid to perceived needs.</li> </ul>                                                                                                                                                                                                                                                                                          |
| 14 | Padmavati et al [23] | 2020 | Learnings from conducting mental health research during 2004 tsunami in Tamil Nadu, India                      | India                    | Qualitative                                         | Disaster | <p>Despite limited data, conclusions were made regarding how to improve psychosocial aid in the future, including educational materials for aid workers and the public, reaching out to communities with higher rates of mental illness, preparation for region specific cultural consideration, as well as dissemination of information for staff on how to deal with vicarious trauma.</p>                                                                                                                                                                 |
| 15 | Andrulis et al. [31] | 2011 | Integrating Racially and Ethnically Diverse Communities Into Planning for Disasters: The California Experience | United States of America | Qualitative (secondary research: literature review) | Disaster | <p>Individual-level barriers:</p> <ul style="list-style-type: none"> <li>• Socioeconomic factors.</li> <li>• Trust; perceived fairness of government.</li> <li>• Culture and language.</li> </ul> <p>Institutional-level barriers:</p> <ul style="list-style-type: none"> <li>• Lack of funding for diversity initiatives.</li> <li>• Limited knowledge about diverse communities.</li> <li>• Limited collaboration with communities.</li> <li>• Integrating social and economic circumstances of communities in emergency planning and response.</li> </ul> |

|    |                          |      |                                                                                                                                                                |        |                                |          |                                                                                                                                                                                                                                                                                                                                                                                                                                                                                                                                                                                                                                                                                                                                                                                                                                                                                                                                                                                            |
|----|--------------------------|------|----------------------------------------------------------------------------------------------------------------------------------------------------------------|--------|--------------------------------|----------|--------------------------------------------------------------------------------------------------------------------------------------------------------------------------------------------------------------------------------------------------------------------------------------------------------------------------------------------------------------------------------------------------------------------------------------------------------------------------------------------------------------------------------------------------------------------------------------------------------------------------------------------------------------------------------------------------------------------------------------------------------------------------------------------------------------------------------------------------------------------------------------------------------------------------------------------------------------------------------------------|
| 16 | O'Sullivan et al. [12]   | 2014 | Use of the Structured Interview Matrix to Enhance Community Resilience Through Collaboration and Inclusive Engagement                                          | Canada | Qualitative                    | Disaster | <p>The SIM is a useful tool to implement these strategies as it facilitates widespread interaction amongst the group, and empowerment and recognition of each participant's voice, while exchanging information and developing plans for collaborative action through the three steps. Awareness and common ground are important capacities for community resilience and promoting adaptive response to disasters. They are also key mechanisms for fostering action during community development initiatives. Common ground does not develop instantaneously, but rather it is the product of an iterative cycle of engagement, information exchange, networking, an empowering climate and inclusion in collaborative activities.</p>                                                                                                                                                                                                                                                    |
| 17 | Panter-Brick et al. [37] | 2020 | Measuring the psychosocial, biological, and cognitive signatures of profound stress in humanitarian settings: impacts, challenges, and strategies in the field | Jordan | Qualitative (primary research) | Conflict | <ul style="list-style-type: none"> <li>• They learnt that high-quality scientific research is feasible, and can be useful and ethical, in humanitarian settings: with the support of a local research team and active engagement with their community</li> <li>• Second, we found young people in the context of a humanitarian crisis to be engaged, motivated, and informed regarding the value of scientific research seeking to determine effective means of supporting them in dealing with the profound stress of conflict and displacement.</li> <li>• Third, we learnt that sustained partnerships between scholars, humanitarians, funders, and beneficiaries across multiple locales produces a strong sense of research ownership – back-and-forth discussions of complex challenges and heterogeneous findings help grow the research agenda.</li> <li>• Finally, we learnt that opportunities for frequent, meaningful conversations are strongly needed– and that</li> </ul> |



|    |                |      |                                                                            |              |                                                 |                              |                                                                                                                                                                                                                                                                                                                                                                                                                                                                                                                                                                                                                                                                                                                                                                                                                                                                     |
|----|----------------|------|----------------------------------------------------------------------------|--------------|-------------------------------------------------|------------------------------|---------------------------------------------------------------------------------------------------------------------------------------------------------------------------------------------------------------------------------------------------------------------------------------------------------------------------------------------------------------------------------------------------------------------------------------------------------------------------------------------------------------------------------------------------------------------------------------------------------------------------------------------------------------------------------------------------------------------------------------------------------------------------------------------------------------------------------------------------------------------|
|    |                |      |                                                                            |              |                                                 |                              | serious dedication to one's work does not preclude dialogue and humour.                                                                                                                                                                                                                                                                                                                                                                                                                                                                                                                                                                                                                                                                                                                                                                                             |
| 18 | Banatvala [28] | 2000 | Public health and humanitarian interventions: developing the evidence base | Not specific | Qualitative (secondary research: case analysis) | Both (disaster and conflict) | <p>People caught up in complex emergencies are often highly vulnerable and may have been severely abused. The key elements of an ethical approach are maximising benefit and minimising harm, obtaining informed consent, ensuring confidentiality, and treating individuals with appropriate clinical care and dignity. Improved collaboration between individuals in the field and those in the academic environment can help promote an appropriate blend of operational expertise with the collection, analysis, critical interpretation, and dissemination of data. Traditional methods of continuing professional development through printed media, conferences and workshops, and training courses are of value but have inherent limitations. Improving opportunities and funding to facilitate linkages of academic institutions and non-governmental</p> |

|    |                 |      |                                                                                                             |                           |                                              |                                                                                                                                                                                                                                                                                                                                                                                                                                                                                                                                                                                                                                                                                                                                                                                                                                                                                                                                                                                                                                                                                                                                                                                                                                             |
|----|-----------------|------|-------------------------------------------------------------------------------------------------------------|---------------------------|----------------------------------------------|---------------------------------------------------------------------------------------------------------------------------------------------------------------------------------------------------------------------------------------------------------------------------------------------------------------------------------------------------------------------------------------------------------------------------------------------------------------------------------------------------------------------------------------------------------------------------------------------------------------------------------------------------------------------------------------------------------------------------------------------------------------------------------------------------------------------------------------------------------------------------------------------------------------------------------------------------------------------------------------------------------------------------------------------------------------------------------------------------------------------------------------------------------------------------------------------------------------------------------------------|
|    |                 |      |                                                                                                             |                           |                                              | organisations and to establish mechanisms for disseminating and debating key findings with relevant stakeholders— donors, host governments, service providers, and, wherever possible, representatives of affected communities—will increase the likelihood of benefits being derived from earlier investments in research and evaluation                                                                                                                                                                                                                                                                                                                                                                                                                                                                                                                                                                                                                                                                                                                                                                                                                                                                                                   |
| 19 | Guha-Sapir [33] | 2020 | Challenges in public health and epidemiology research in humanitarian settings: experiences from the field. | India, Phillipines, Nepal | Qualitative (secondary research: commentary) | Disaster <ul style="list-style-type: none"> <li>• Contingency plans for dealing with logistical and administrative challenges help to anticipate potential barriers and foster timely problem solving for those that are unforeseen.</li> <li>• Choosing data collection methods and sources to sidestep concerns associated with displacement and destruction ensures access to study subjects. It also mitigates concerns of bias introduced into standard sampling frames used in population surveys.</li> <li>• Research teams must work closely with local teams, consult with them from the start, and share research benefits fairly. This is not only in the interests of equity, but it protects the research outputs from embarrassing oversights and enriches the results.</li> <li>• Further, researchers in humanitarian settings must weave through complex political and cultural labyrinths, requiring a clear idea of the agendas being promoted by different stakeholders and the potential impact these narratives have on the dissemination of research.</li> <li>• Understanding cultural and circumstantial factors surrounding research,</li> <li>• Disseminating results in a timely manner, and sharing</li> </ul> |

|    |                             |  |                                                                                                                                  |       |                                                  |          |                                                                                                                                                                                                                                                                                                                                                                                                                                                                                                                                                                                                                                                                                                                                                                                                                                                                                                                                                                                                                                                                                                                 |
|----|-----------------------------|--|----------------------------------------------------------------------------------------------------------------------------------|-------|--------------------------------------------------|----------|-----------------------------------------------------------------------------------------------------------------------------------------------------------------------------------------------------------------------------------------------------------------------------------------------------------------------------------------------------------------------------------------------------------------------------------------------------------------------------------------------------------------------------------------------------------------------------------------------------------------------------------------------------------------------------------------------------------------------------------------------------------------------------------------------------------------------------------------------------------------------------------------------------------------------------------------------------------------------------------------------------------------------------------------------------------------------------------------------------------------|
|    |                             |  |                                                                                                                                  |       |                                                  |          | data are critical for the ethical conduct of research amongst vulnerable, disaster-affected populations.                                                                                                                                                                                                                                                                                                                                                                                                                                                                                                                                                                                                                                                                                                                                                                                                                                                                                                                                                                                                        |
| 20 | Durrance-Bagale et al. [11] |  | Community engagement in health systems interventions and research in conflict-affected countries: a scoping review of approaches | World | Qualitative (secondary research: scoping review) | Conflict | Community engagement in identifying and setting priorities, decision-making, implementing, and evaluating potential solutions helps people share their views and encourages a sense of ownership and increases the likely success of healthcare interventions. However, engaging communities can be particularly difficult in conflict-affected settings, where priorities may not be easy to identify, and many other factors, such as safety, power relations, and entrenched inequalities, must be considered. Involvement of community leaders (trust and accessibility), contextualisation (e.g. ensuring that conflict, displacement, and other community context is considered), equity (ensuring everyone has opportunities to share their views), transparency (providing a forum for feedback) and autonomy (community bottom-up leadership rather than top-down whenever possible). One issue is that community engagement is often talked about but is framed as a consultative process rather than an attempt to empower communities, with the aim of putting final decision-making in their hands |

|    |                   |      |                                                                                                                               |       |                                  |                              |                                                                                                                                                                                                                                                                                                                                                                                                                                                                                                                                                                                                                                                                                                                                                                                                                                                                                                                                                                                                                                                                                                                        |
|----|-------------------|------|-------------------------------------------------------------------------------------------------------------------------------|-------|----------------------------------|------------------------------|------------------------------------------------------------------------------------------------------------------------------------------------------------------------------------------------------------------------------------------------------------------------------------------------------------------------------------------------------------------------------------------------------------------------------------------------------------------------------------------------------------------------------------------------------------------------------------------------------------------------------------------------------------------------------------------------------------------------------------------------------------------------------------------------------------------------------------------------------------------------------------------------------------------------------------------------------------------------------------------------------------------------------------------------------------------------------------------------------------------------|
| 21 | Panter-Brick [22] | 2022 | Energizing partnerships in research-to-policy projects                                                                        | World | Qualitative (secondary research: | Conflict                     | Approaches that foster synthetic knowledge and creative partnerships through biocultural and people-centered research are not easy to implement and certainly unusual in conflict zones. Two benefits of biocultural research are to create room for synthetic conversation with diverse audiences and creative ways of working with communities. Biocultural research on refugee well-being helps to reach a diverse range of interlocutors: scholars, practitioners, policymakers, funders, and civil society actors who work with crisis-affected people. Importantly, biocultural work can be rooted, creatively, in practices that respect and value our shared humanity. Community-empowerment tool kits proved insufficient to tackle entrenched power hierarchies, lack of trust, and conflict over material resources; these effectively undermined a project to address health inequities and build social cohesion among refugees and host populations. Embedding research within people-centered partnerships, equitably, is an iterative process that traces an arc from project design to dissemination. |
| 22 | CDAC Network [18] | 2017 | The role of collective platforms, services and tools to support communication and community engagement in humanitarian action | World | Policy paper                     | Both (disaster and conflict) | Integration of communication and community engagement with feedback from population is key to the response mechanisms. Dedicated resources (either financial and human) to communication and community engagement is more effective where added onto existing staff responsibilities. International organization should recognize and use local existing communication and community engagement mechanisms. Capacity building in communication and community engagement strategies as an approach in preparedness planning                                                                                                                                                                                                                                                                                                                                                                                                                                                                                                                                                                                             |

|    |                       |      |                                                                                                                                                                                       |                          |        |          |                                                                                                                                                                                                                                                                                                                                                                                                                                                                                                                                                                       |
|----|-----------------------|------|---------------------------------------------------------------------------------------------------------------------------------------------------------------------------------------|--------------------------|--------|----------|-----------------------------------------------------------------------------------------------------------------------------------------------------------------------------------------------------------------------------------------------------------------------------------------------------------------------------------------------------------------------------------------------------------------------------------------------------------------------------------------------------------------------------------------------------------------------|
| 23 | Barbelet [17]         | 2020 | Collective approaches to communication and community engagement in the Central African Republic                                                                                       | Central African Republic | Report | Conflict | There needs to be more dissemination of information to country-level actors involved in collective approaches, including Humanitarian Coordinators, cluster leads, NGO coordinators, and coordinators of the collective approach. Guidance is needed for the agency that takes a lead in driving the collective approach, for example UNICEF. This should include information on how best to manage hosting the collective approach in terms of reporting lines, budget responsibility, standard operation procedures for decision-making and fundraising guidelines. |
| 24 | Holloway and Fan [19] | 2020 | Collective approaches to communication and community engagement in the Central Sulawesi response                                                                                      | Indonesia                | Report | Disaster | The response to the Central Sulawesi earthquake, tsunami (...) demonstrates that a collective approach is possible, but it does not guarantee good CCE. Likewise, CCE can happen without a collective approach, but it did benefit from it. In this response, the communication of important information to affected communities did not really improve, nor was the response modified significantly based on their feedback, though likely more than if there had not been a collective approach.                                                                    |
| 25 | Yonally et al. [13]   | 2021 | Review of the Evidence Landscape on the Risk Communication and Community Engagement Interventions Among the Rohingya Refugees to Enhance Healthcare Seeking Behaviours in Cox's Bazar | Bangladesh               | Report | Conflict | The risk communication aspect of RCCE, and content of messaging relating to risk, was generally considered to be appropriate in Cox's Bazar. However, what was still lacking is two-way engagement that provides the refugee population with the opportunity to engage with the material provided, ask questions, and contribute their own experiences, concerns or ideas.                                                                                                                                                                                            |
